# Supplementary material
Source: Research Square preprint supplement (doi:10.21203/rs.3.rs-9455345/v1)
Supplement: Supplementary file 1 [file d4f14b44c76dfbd463a964a7.docx]

# Supplementary Information

**Title:** Prey availability and fine-scale oceanography drive reef manta ray aggregations at the world’s largest hotspot

**Journal name:** Journal of Marine Biology

**Authors:** Hannah M. Moloney, Guy M. W. Stevens, Asia O. Armstrong, Alvise Dabala, Christine L. Dudgeon, Tamaryn J. Sawers, Elspeth M. Strike, Kathy A. Townsend, Anthony J. Richardson

**Corresponding author and affiliations**: Hannah M. Moloney1,2,3,4 - hannah.moloney@research.usc.edu.au

1University of the Sunshine Coast, School of Science, Technology and Engineering, Hervey Bay, Queensland, Australia

2The Manta Trust, Catemwood House, Norwood Lane, Corscombe, Dorset, DT2 0NT, United Kingdom

3Maldives Manta Conservation Programme, M. Kureli, Buruzu Magu, Maafannu, 20304, Malé, Republic of Maldives

4Commonwealth Scientific and Industrial Research Organisation (CSIRO) Environment, BioSciences Precinct (QBP), St Lucia, Queensland, Australia


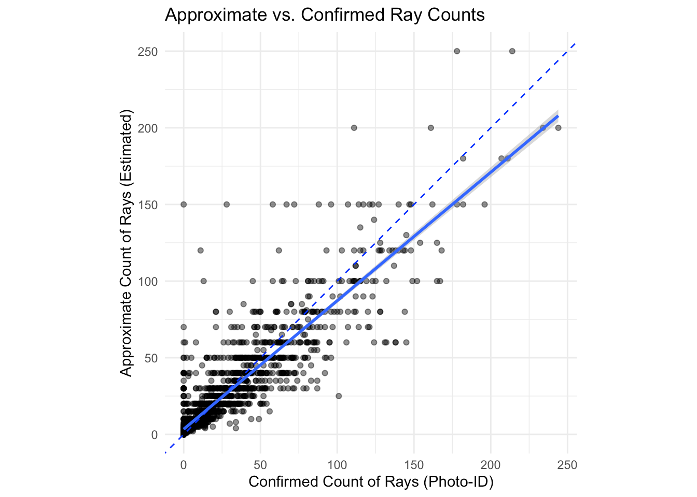


**Online Resource. 1** Individual *Mobula alfredi* sighted during surveys using an “approximate count of sightings” (total individuals observed) and a “confirmed count of sightings” (unique individuals verified via photo-identification (ID)). In this study, for *M. alfredi* abundance we used the confirmed count of sightings unless it deviated by ≥50% from the estimated count of sightings, in which the estimated count was adopted to avoid under-representation of abundance when there were many manta rays present and photo-ID of all individuals was difficult
